# Supplementary material
Source: Springer Nature journal article supplement (https://www.springermedizin.de/resource/supplementary/12968_2012_3274_MOESM1_ESM.pdf/9583504)
Supplement: MOESM1 [file 9583504]

# Scar Transmurality Quantification

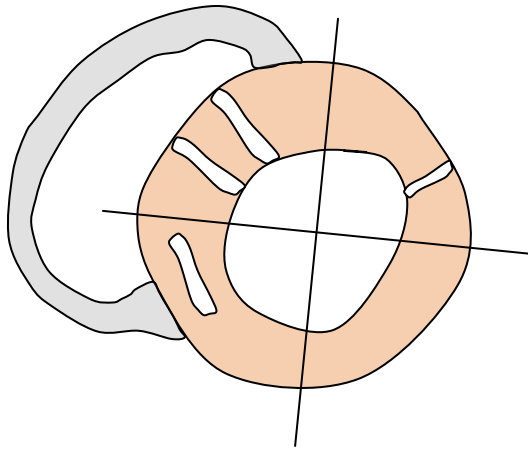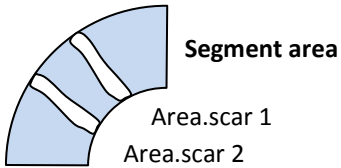

$$\text{STAB \%} = \frac{\sum \text{area. scar}}{\text{Segment area}}$$

**STAB %**

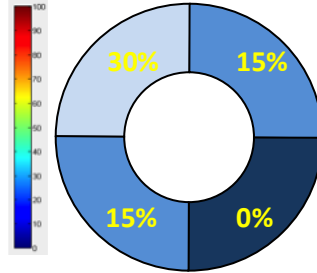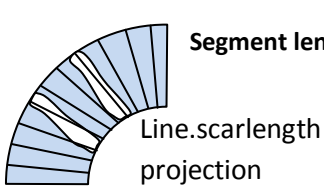

$$\text{STLB \%} = \frac{\sum \text{line. scar}}{\text{Segment length}}$$

**STLB %**

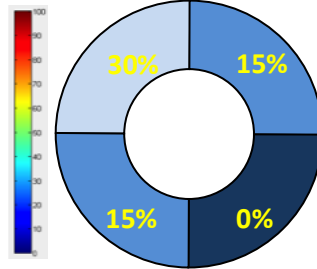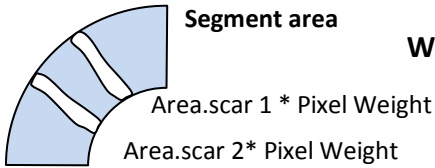

$$\text{WIT \%} = \frac{\sum \text{area. scar weighted}}{\text{Segment area}}$$

**WIT %**

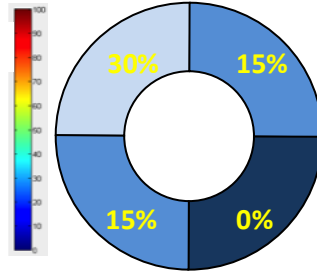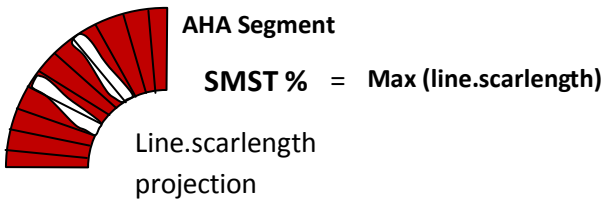

**SMST %**

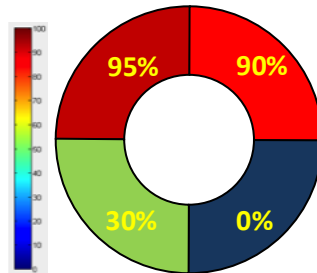

**Segment area normalization**

**No area normalization**

Example of changing values in the same area of fibrosis depending on the method of calculation: algorithms that normalize by the total area of the AHA segment lose the spatial concept of transmuralty (STAB, STLB and WIT), and algorithms that do not normalize by the area retain spatial information (SMST).
